# Supplementary material for: Genomes in turmoil: quantification of genome dynamics in prokaryote supergenomes
Source: PubMed Central journal article supplement (PMC4166000; doi:10.1186/s12915-014-0066-4), 2014-08-21
Supplement: 12915_2014_66_MOESM3_ESM.pdf [file 12915_2014_66_MOESM3_ESM.pdf]

| ATGC    | GENERA                                                   | Total Branch Length | Tree Depth | Total inferred number |       |           |           | Rate per substitution per site |          |           |           | Rate per substitution per gene |         |           |           | Principal components |        |        |        | Total Flux rate | Balance Ratio | Pangenome | Number of non-ancestral gains | Number of multiple non-ancestral gains | Supergenome estimate, uniform distribution |                           |                         | Supergenome estimate, power law distribution |          | Supergenome estimate, binomial mixture |       | Supergenome estimate, capture-recapture | Number of genomes | Median genome Size   |         |                      | Median GC content | Median dN/dS | Synteny distance (dY) at 0.01 dNT | Lifestyle   |                             |
|---------|----------------------------------------------------------|---------------------|------------|-----------------------|-------|-----------|-----------|--------------------------------|----------|-----------|-----------|--------------------------------|---------|-----------|-----------|----------------------|--------|--------|--------|-----------------|---------------|-----------|-------------------------------|----------------------------------------|--------------------------------------------|---------------------------|-------------------------|----------------------------------------------|----------|----------------------------------------|-------|-----------------------------------------|-------------------|----------------------|---------|----------------------|-------------------|--------------|-----------------------------------|-------------|-----------------------------|
|         |                                                          |                     |            | Gain                  | Loss  | Expansion | Reduction | Gain                           | Loss     | Expansion | Reduction | Gain                           | Loss    | Expansion | Reduction | PC1                  | PC2    | PC3    | PC4    |                 |               |           |                               |                                        | Size                                       | Confidence interval width | Relative to genome size | Size                                         | Exponent | Relative to genome size                | Size  |                                         |                   | Number of categories | bp      | Protein-coding genes |                   |              |                                   |             | Gene Families               |
| ATGC001 | Citrobacter-Enterobacter-Escherichia-Salmonella-Shigella | 1.689               | 0.183      | 31359                 | 85342 | 3149      | 7441      | 18562.6                        | 50516.8  | 1863.8    | 4404.7    | 17.306                         | 47.098  | 1.738     | 4.107     | -1.361               | 0.275  | 0.694  | 0.238  | 75348           | 0.372         | 24845     | 28950                         | 10059                                  | 37267                                      | 458                       | 8.84                    | 45092                                        | 0.44     | 10.70                                  | 33452 | 6                                       | 55175             | 109                  | 4989733 | 4652                 | 4215              | 0.528        | 0.045                             | 0.04255     | facultative host-associated |
| ATGC002 | Enterobacter-Klebsiella                                  | 0.350               | 0.066      | 9050                  | 2256  | 670       | 83        | 25865.7                        | 6447.7   | 1914.3    | 236.7     | 24.475                         | 6.101   | 1.811     | 0.224     | 0.898                | 2.117  | -0.711 | 0.165  | 34464           | 4.156         | 10802     | 8922                          | 2429                                   | 17560                                      | 429                       | 3.35                    | 18403                                        | 0.23     | 3.52                                   | 14326 | 4                                       | 17357             | 11                   | 5680456 | 5375                 | 5234              | 0.583        | 0.039                             | 0.00819     | facultative host-associated |
| ATGC003 | Streptococcus                                            | 0.208               | 0.067      | 2479                  | 11153 | 285       | 1061      | 11893.5                        | 53500.2  | 1368.4    | 5091.6    | 11.783                         | 53.004  | 1.356     | 5.044     | -1.040               | -0.325 | 0.922  | 0.244  | 71854           | 0.226         | 4478      | 2117                          | 482                                    | 6754                                       | 297                       | 3.34                    | 6754                                         | 0.00     | 3.34                                   | 5907  | 6                                       | 7051              | 22                   | 2133789 | 2114                 | 2020              | 0.408        | 0.182                             | 0.04313     | free-living                 |
| ATGC004 | Streptococcus                                            | 0.264               | 0.094      | 1485                  | 7707  | 422       | 787       | 5632.8                         | 29232.9  | 1600.8    | 2984.4    | 5.500                          | 28.543  | 1.563     | 2.914     | -0.198               | -0.864 | 0.212  | 0.540  | 39451           | 0.225         | 3746      | 1209                          | 167                                    | 6664                                       | 554                       | 3.69                    | 6664                                         | 0.00     | 3.69                                   | 5872  | 5                                       | 5332              | 22                   | 1910066 | 1865                 | 1808              | 0.395        | 0.176                             | 0.03210     | free-living                 |
| ATGC005 | Streptococcus                                            | 0.106               | 0.023      | 1260                  | 4456  | 396       | 251       | 11939.7                        | 42215.0  | 3755.0    | 2379.5    | 11.322                         | 40.030  | 3.561     | 2.256     | -1.206               | 0.003  | -0.439 | 0.292  | 60289           | 0.352         | 3466      | 1186                          | 124                                    | 7669                                       | 877                       | 3.94                    | 7669                                         | 0.00     | 3.94                                   | 4688  | 5                                       | 5814              | 16                   | 2084900 | 1977                 | 1948              | 0.422        | 0.093                             | 0.01850     | free-living                 |
| ATGC014 | Bacillus                                                 | 0.459               | 0.073      | 11687                 | 35535 | 1786      | 3168      | 25485.4                        | 77488.3  | 3895.5    | 6908.0    | 25.539                         | 77.651  | 3.904     | 6.922     | -2.422               | 0.426  | 0.305  | 0.325  | 113777          | 0.348         | 16678     | 10985                         | 1514                                   | 43303                                      | 1676                      | 7.83                    | 43303                                        | 0.00     | 7.83                                   | 26600 | 6                                       | 37108             | 31                   | 5691541 | 5704                 | 5533              | 0.361        | 0.054                             | 0.02911     | free-living                 |
| ATGC015 | Bacillus                                                 | 0.658               | 0.223      | 4292                  | 16649 | 529       | 884       | 6521.1                         | 25293.2  | 803.6     | 1342.8    | 6.562                          | 25.453  | 0.809     | 1.351     | 0.611                | -0.467 | 0.596  | 0.018  | 33961           | 0.275         | 9242      | 4094                          | 162                                    | 55655                                      | 7699                      | 14.00                   | 78848                                        | 0.36     | 19.83                                  | 67131 | 7                                       | 18605             | 24                   | 4063283 | 4089                 | 3976              | 0.459        | 0.058                             | 0.01422     | free-living                 |
| ATGC021 | Chlamydia                                                | 0.029               | 0.004      | 471                   | 748   | 12        | 7         | 16346.1                        | 25967.5  | 418.8     | 240.0     | 14.033                         | 22.293  | 0.360     | 0.206     | 1.343                | 1.029  | 0.833  | -1.202 | 42972           | 0.640         | 1168      | 439                           | 193                                    | 1260                                       | 31                        | 1.40                    | 1344                                         | 0.51     | 1.49                                   | 1303  | 5                                       | 1567              | 44                   | 1046020 | 898                  | 901               | 0.417        | 0.429                             | 0.00275     | intracellular parasite      |
| ATGC022 | Chlamydia-Chlamydophila                                  | 0.116               | 0.046      | 628                   | 1295  | 140       | 61        | 5434.3                         | 11201.6  | 1212.8    | 524.3     | 5.232                          | 10.784  | 1.168     | 0.505     | 1.308                | -0.148 | -0.376 | 0.252  | 18373           | 0.567         | 1441      | 536                           | 163                                    | 1758                                       | 83                        | 1.74                    | 1759                                         | 0.00     | 1.74                                   | 1576  | 5                                       | 1792              | 19                   | 1169029 | 1126                 | 1011              | 0.397        | 0.400                             | 0.00840     | intracellular parasite      |
| ATGC025 | Mycobacterium                                            | 0.110               | 0.007      | 5579                  | 8218  | 561       | 407       | 50822.9                        | 74867.5  | 5109.4    | 3708.1    | 45.888                         | 67.598  | 4.613     | 3.348     | -2.635               | 1.430  | -0.001 | 0.010  | 134508          | 0.712         | 7293      | 5264                          | 1850                                   | 9484                                       | 190                       | 2.47                    | 13514                                        | 0.63     | 3.52                                   | 13106 | 6                                       | 17474             | 32                   | 4409130 | 3981                 | 3836              | 0.659        |                                   | 0.03113     | facultative host-associated |
| ATGC033 | Mycoplasma                                               | 0.026               | 0.013      | 152                   | 216   | 64        | 14        | 5864.8                         | 8335.1   | 2483.7    | 547.6     | 4.611                          | 6.553   | 1.953     | 0.431     | 0.952                | 0.064  | -1.086 | 0.678  | 17231           | 0.940         | 883       | 178                           | 14                                     | 1784                                       | 539                       | 2.40                    | 1785                                         | 0.00     | 2.41                                   | 901   | 3                                       | 901               | 11                   | 968554  | 762                  | 742               | 0.319        |                                   |             | facultative host-associated |
| ATGC046 | Rickettsia                                               | 0.482               | 0.097      | 3222                  | 11422 | 157       | 362       | 6677.0                         | 23673.5  | 324.6     | 750.0     | 7.440                          | 26.379  | 0.362     | 0.836     | 1.477                | -0.309 | 1.258  | -0.492 | 31425           | 0.287         | 4454      | 3109                          | 344                                    | 14677                                      | 1293                      | 13.26                   | 24011                                        | 0.47     | 21.69                                  | 7280  | 6                                       | 11509             | 40                   | 1233088 | 1374                 | 1107              | 0.322        | 0.117                             | 0.05306     | intracellular parasite      |
| ATGC052 | Helicobacter                                             | 1.157               | 0.117      | 4320                  | 9597  | 333       | 1127      | 3732.7                         | 8293.4   | 287.7     | 973.6     | 3.584                          | 7.964   | 0.276     | 0.935     | 2.284                | -0.720 | 1.164  | 0.450  | 13287           | 0.434         | 4568      | 3978                          | 1351                                   | 6377                                       | 179                       | 4.25                    | 7246                                         | 0.40     | 4.83                                   | 8632  | 6                                       | 11675             | 51                   | 1628207 | 1564                 | 1501              | 0.397        | 0.160                             | 0.00712     | facultative host-associated |
| ATGC054 | Staphylococcus                                           | 0.085               | 0.014      | 1834                  | 12525 | 249       | 1849      | 21511.8                        | 146937.4 | 2923.8    | 21695.6   | 19.886                         | 135.834 | 2.703     | 20.056    | -3.023               | -0.300 | 1.098  | 0.404  | 193069          | 0.145         | 4815      | 1917                          | 334                                    | 8071                                       | 464                       | 3.29                    | 8322                                         | 0.20     | 3.39                                   | 5792  | 7                                       | 7074              | 41                   | 2837953 | 2624                 | 2452              | 0.337        | 0.100                             | 0.04813     | free-living                 |
| ATGC056 | Lactobacillus                                            | 0.316               | 0.147      | 1078                  | 5540  | 345       | 99        | 3417.1                         | 17553.4  | 1093.8    | 313.6     | 3.341                          | 17.160  | 1.069     | 0.307     | 1.602                | -0.722 | -0.591 | -0.316 | 22378           | 0.252         | 4893      | 1055                          | 0 open                                 |                                            |                           |                         |                                              |          | 5784                                   | 4     | 6340                                    | 10                | 3024728              | 2957    | 2896                 | 0.473             | 0.033        | 0.04546                           | free-living |                             |
| ATGC067 | Corynebacterium                                          | 0.025               | 0.009      | 253                   | 3690  | 40        | 19        | 10013.0                        | 146236.3 | 1581.7    | 734.4     | 9.006                          | 131.524 | 1.423     | 0.661     | -0.691               | -0.361 | 0.022  | -1.447 | 158565          | 0.079         | 2721      | 287                           | 0 open                                 |                                            |                           |                         |                                              |          | 3144                                   | 5     | 3588                                    | 15                | 2322675              | 2089    | 2074                 | 0.530             | 0.136        | 0.00693                           | free-living |                             |
| ATGC068 | Corynebacterium                                          | 0.081               | 0.012      | 431                   | 6691  | 188       | 356       | 5337.6                         | 82891.0  | 2334.8    | 4413.8    | 4.894                          | 76.005  | 2.141     | 4.047     | -1.146               | -1.362 | 0.109  | 0.097  | 94977           | 0.088         | 3453      | 499                           | 0 open                                 |                                            |                           |                         |                                              |          | 3889                                   | 4     | 4519                                    | 12                | 2466919              | 2262    | 2227                 | 0.543             | 0.111        | 0.01556                           | free-living |                             |
| ATGC072 | Pseudomonas                                              | 0.550               | 0.107      | 5760                  | 14042 | 1190      | 972       | 10466.9                        | 25516.1  | 2162.0    | 1766.2    | 9.248                          | 22.545  | 1.910     | 1.561     | -0.384               | 0.067  | -0.119 | 0.368  | 39911           | 0.463         | 11389     | 5603                          | 129                                    | 125699                                     | 20767                     | 23.73                   | 125700                                       | 0.00     | 23.73                                  | 24983 | 5                                       | 28686             | 12                   | 6095696 | 5386                 | 5297              | 0.633        | 0.033                             | 0.02630     | free-living                 |
| ATGC082 | Clostridium                                              | 0.117               | 0.024      | 843                   | 9655  | 437       | 120       | 7222.7                         | 82676.3  | 3745.0    | 1030.4    | 6.623                          | 75.815  | 3.434     | 0.945     | -0.926               | -0.604 | -0.878 | -0.576 | 94674           | 0.131         | 5993      | 1007                          | 0 open                                 |                                            |                           |                         |                                              |          | 9718                                   | 5     | 8607                                    | 10                | 4025029              | 3691    | 3655                 | 0.292             | 0.099        | 0.01886                           | free-living |                             |
| ATGC089 | Burkholderia                                             | 0.117               | 0.024      | 4630                  | 29516 | 583       | 400       | 39592.8                        | 252405.6 | 4988.0    | 3417.1    | 35.492                         | 226.265 | 4.471     | 3.063     | -3.105               | 0.745  | 0.053  | -0.894 | 300403          | 0.174         | 13381     | 4901                          | 12 open                                |                                            |                           |                         |                                              |          | 30825                                  | 5     | 30581                                   | 13                | 6406482              | 5743    | 5707                 | 0.688             | 0.077        | 0.05573                           | free-living |                             |
| ATGC090 | Burkholderia                                             | 0.389               | 0.070      | 5936                  | 21057 | 1781      | 639       | 15276.1                        | 54191.8  | 4582.4    | 1643.7    | 13.586                         | 48.196  | 4.075     | 1.462     | -1.418               | 0.316  | -0.682 | -0.061 | 75694           | 0.356         | 14540     | 6508                          | 0 open                                 |                                            |                           |                         |                                              |          | 23983                                  | 5     | 28567                                   | 12                | 7530187              | 6697    | 6428                 | 0.678             | 0.057        | 0.00406                           | free-living |                             |
| ATGC094 | Sulfolobus                                               | 0.162               | 0.071      | 963                   | 6893  | 635       | 266       | 5955.8                         | 42639.2  | 3930.5    | 1643.1    | 6.064                          | 43.415  | 4.002     | 1.673     | -0.722               | -0.729 | -0.876 | 0.190  | 54169           | 0.223         | 4471      | 986                           | 0 open                                 |                                            |                           |                         |                                              |          | 5629                                   | 5     | 6483                                    | 12                | 2686155              | 2735    | 2638                 | 0.356             | 0.231        | 0.07020                           | free-living |                             |
| ATGC105 | Bifidobacterium                                          | 0.287               | 0.117      | 2983                  | 3202  | 188       | 235       | 10383.5                        | 11147.5  | 654.8     | 817.4     | 8.342                          | 8.955   | 0.526     | 0.657     | 1.173                | 0.479  | 0.648  | 0.239  | 23003           | 0.923         | 4352      | 2913                          | 411                                    | 11174                                      | 829                       | 5.72                    | 11174                                        | 0.00     | 5.72                                   | 30285 | 5                                       | 6607              | 11                   | 2454110 | 1972                 | 1952              | 0.609        | 0.086                             | 0.07281     | facultative host-associated |
| ATGC106 | Bifidobacterium                                          | 0.047               | 0.023      | 523                   | 781   | 35        | 38        | 11039.4                        | 16473.2  | 742.2     | 811.7     | 8.922                          | 13.314  | 0.600     | 0.656     | 0.858                | 0.428  | 0.588  | -0.022 | 29067           | 0.682         | 2018      | 452                           | 32                                     | 4631                                       | 1020                      | 2.95                    | 5619                                         | 0.37     | 3.58                                   | 2221  | 4                                       | 2363              | 10                   | 1938894 | 1567                 | 1568              | 0.615        |                                   |             | facultative host-associated |
| ATGC109 | Listeria                                                 | 0.656               | 0.168      | 5021                  | 2239  | 362       | 136       | 7650.2                         | 3411.0   | 551.3     | 207.2     | 7.536                          | 3.360   | 0.543     | 0.204     | 2.698                | 0.861  | -0.009 | 0.371  | 11820           | 2.267         | 5834      | 4899                          | 1623                                   | 8207                                       | 210                       | 2.89                    | 11712                                        | 0.59     | 4.12                                   | 6625  | 6                                       | 6881              | 31                   | 2934366 | 2891                 | 2843              | 0.385        | 0.030                             | 0.01692     | free-living                 |
| ATGC121 | Shewanella                                               | 0.644               | 0.172      | 5522                  | 3438  | 626       | 224       | 8575.7                         | 5339.8   | 972.9     | 348.5     | 7.295                          | 4.543   | 0.828     | 0.296     | 1.802                | 0.738  | -0.265 | 0.459  | 15237           | 1.679         | 8090      | 5274                          | 1024                                   | 15597                                      | 633                       | 3.74                    | 15929                                        | 0.16     | 3.82                                   | 58299 | 5                                       | 13057             | 14                   | 5125160 | 4360                 | 4166              | 0.475        | 0.045                             | 0.02065     | free-living                 |
| ATGC128 | Yersinia                                                 | 0.238               | 0.102      | 4821                  | 9403  | 570       | 564       | 20234.4                        | 39460.0  | 2390.6    | 2368.8    | 17.546                         | 34.216  | 2.073     | 2.054     | -1.145               | 0.632  | 0.181  | 0.149  | 64454           | 0.541         | 8287      | 4421                          | 729                                    | 16479                                      | 778                       | 4.19                    | 20747                                        | 0.41     | 5.27                                   | 1007  |                                         |                   |                      |         |                      |                   |              |                                   |             |                             |
